# Supplementary material for: The relationship between the surface oxygen species and the acidic properties of mesoporous metal oxides and their effects on propane oxidation
Source: Royal Society of Chemistry journal article supplement (doi:10.1039/c4cy01231c), 2014-11-04
Supplement: c4cy01231c1.pdf [file c4cy01231c1.pdf]

# The relationship between the surface oxygen species and the acidic properties of mesoporous metal oxides and their effects on propane oxidation

Shu Chen<sup>a</sup>, Yanhua Li<sup>a</sup>, Fei Ma<sup>a</sup>, Fang Chen<sup>a</sup>, Weimin Lu<sup>\*a</sup>

## Characterizations

### Raman

The Raman spectra were collected with an HR LabRaman 800 configuration, equipped with a liquid nitrogen-cooled CCD detector using the 514.5 nm line of an Ar<sup>+</sup> laser. The laser power was 10 mW. Scan time was 30 s and the spectral range was 100-2000 cm<sup>-1</sup>.

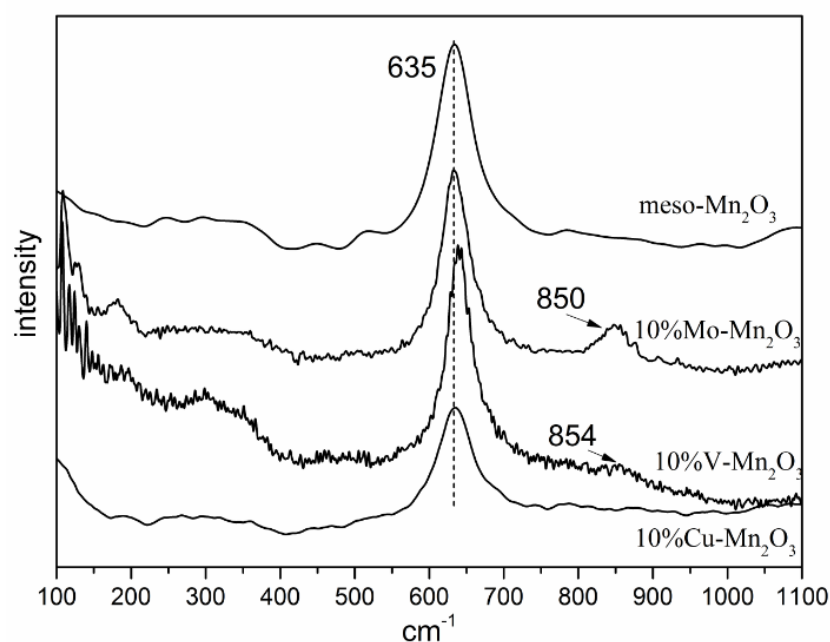

**Fig. S1** Raman spectra of 10% V-Mn<sub>2</sub>O<sub>3</sub>, 10% Cu-Mn<sub>2</sub>O<sub>3</sub>, 10% Mo-Mn<sub>2</sub>O<sub>3</sub>, meso-Mn<sub>2</sub>O<sub>3</sub> samples.

Raman band located at 635 cm<sup>-1</sup> can be assigned to the Mn-O stretching vibration of the MnO<sub>6</sub> group.<sup>S1</sup> On the Mo-Mn<sub>2</sub>O<sub>3</sub> catalyst, the vibration at 850 cm<sup>-1</sup> is Mo-O-Mo vibration in highly dispersed surface molybdate ([MoO<sub>4</sub>]<sup>2-</sup>).<sup>S2</sup> As the vibrations at 300-340 cm<sup>-1</sup> for small crystallites of bulk structure and at 955 cm<sup>-1</sup> for surface molybdate were not detected, we consider that the Mo-O-Mo species on the Mo-Mn<sub>2</sub>O<sub>3</sub> catalyst are dominated in highly

dispersed surface molybdate ( $[\text{MoO}_4]^{2-}$ ). About the state of vanadia, researchers have reported that the vibrations at  $1020\sim 1035\text{ cm}^{-1}$  belong to the  $\text{V}=\text{O}$  vibrations of monovanadate species and the bands in the  $860\text{ cm}^{-1}$  or  $930\text{ cm}^{-1}$  can be ascribed to the stretching modes in polyvanadate species.<sup>S3, S4, S5</sup> In the present study, the vibrations at  $1020\sim 1035\text{ cm}^{-1}$  region did not be detected. We observed a very weak  $\text{V}-\text{O}-\text{V}$  bond centered at  $854\text{ cm}^{-1}$ , if the band might be considered a peak. The  $\text{V}$  species could disperse well on  $\text{V}-\text{Mn}_2\text{O}_3$  catalyst surface. Vibration peak of  $\text{Cu}$  aggregated state species were not detected on the  $\text{Cu}-\text{Mn}_2\text{O}_3$ .

### HAADF-STEM and elemental mapping images

HAADF-STEM were performed using a Tecnai F20 G2 High-Resolution TEM (HRTEM) electron microscope. The composition of  $\text{V}-\text{Mn}_2\text{O}_3$  and  $\text{Mo}-\text{Mn}_2\text{O}_3$  were characterized using energy dispersive X-ray spectroscopy (EDX)–elemental mapping analysis. The FEI TIA software was used to control the STEM-EDX mapping.

Fig.S2A and Fig.S2B show HAADF-STEM and elemental mapping images of loaded  $\text{V}$  and  $\text{Mo}$  on  $\text{meso}-\text{Mn}_2\text{O}_3$  surface. The  $\text{V}$  and  $\text{Mo}$  mapping prove the well distribution of the element signals on the surface of the particles.

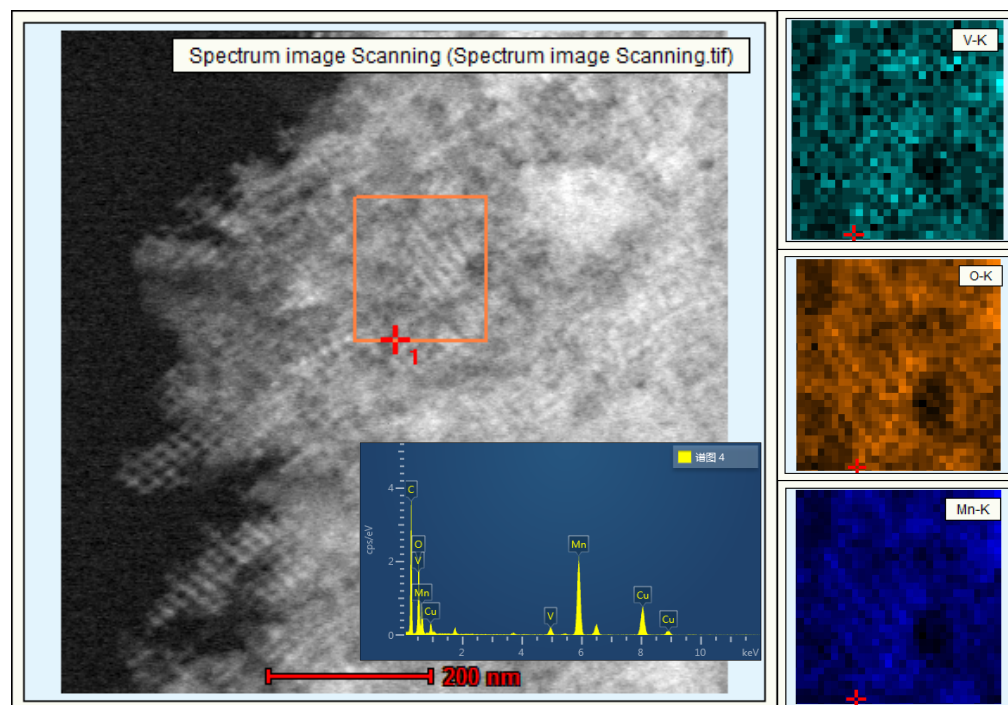

**Fig. S2A** HAADF-STEM and elemental mapping images of  $\text{V}$  are presented. Scale bar: STEM 200 nm, elemental mapping 100 nm.

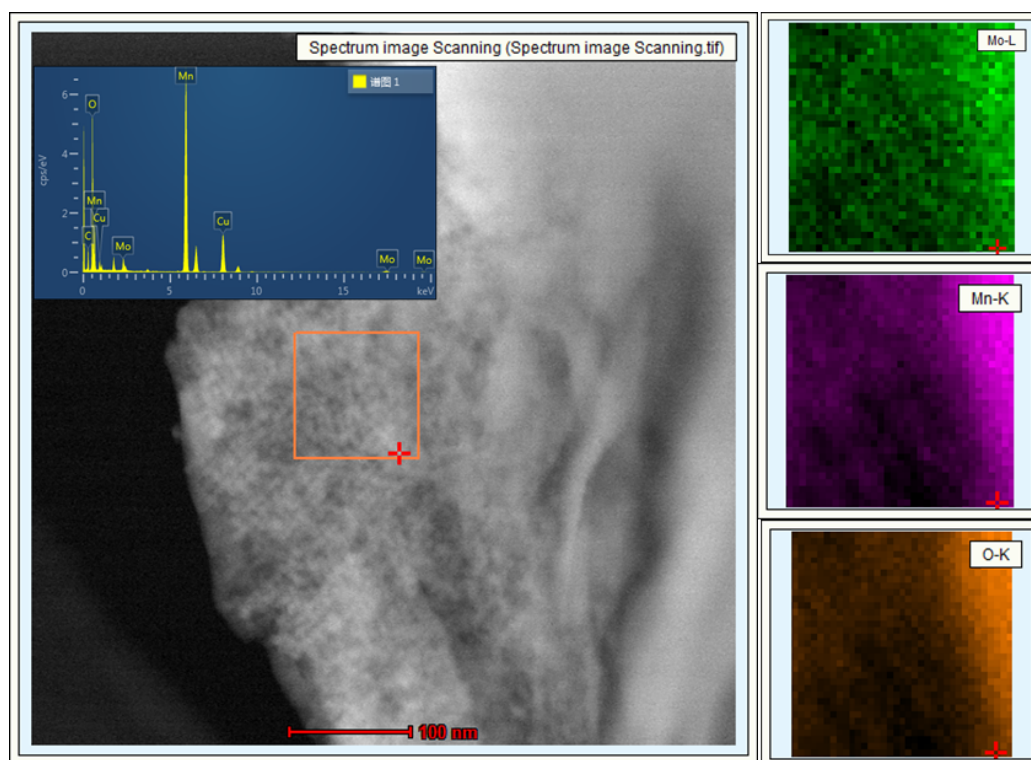

**Fig. S2B** HAADF-STEM and elemental mapping images of Mo are presented. Scale bar: HAADF-STEM 100 nm, elemental mapping 100 nm.

**Table 1S.** The performance of the catalysts. Reaction condition: Temperature 480°C, GHSV = 4500 mL (g h)<sup>-1</sup>, and C<sub>3</sub>H<sub>8</sub> : O<sub>2</sub> = 1 : 1 (molar ratio)

| catalyst                             | Conversion (%) | Selectivity (%) |                 |                 |                   |     |     |     |     |      |                 |
|--------------------------------------|----------------|-----------------|-----------------|-----------------|-------------------|-----|-----|-----|-----|------|-----------------|
|                                      |                | C <sub>1</sub>  | C <sub>2=</sub> | C <sub>3=</sub> | CH <sub>2</sub> O | ALD | ACR | AcT | AcA | CO   | CO <sub>2</sub> |
| Meso-Mn <sub>2</sub> O <sub>3</sub>  | 24.3           | 2.2             | 20.6            | 18.6            | 0.0               | 0.0 | 0.0 | 0.0 | 0.0 | 0.0  | 58.2            |
| bulk-Mn <sub>2</sub> O <sub>3</sub>  | 21.1           | 4.8             | 30.6            | 22.8            | 0.0               | 0.0 | 0.0 | 0.0 | 0.0 | 0.0  | 41.1            |
| 10%Mo-Mn <sub>2</sub> O <sub>3</sub> | 22.2           | 1.3             | 12.0            | 37.2            | 1.5               | 1.2 | 2.2 | 0.0 | 0.0 | 11.6 | 33.0            |
| 10%Cu-Mn <sub>2</sub> O <sub>3</sub> | 19.7           | 0.9             | 12.2            | 29.5            | 0.2               | 0.6 | 0.0 | 0.0 | 0.0 | 0.0  | 56.6            |
| 1%V-Mn <sub>2</sub> O <sub>3</sub>   | 25.7           | 3.4             | 27.5            | 17.4            | 1.1               | 0.0 | 0.0 | 0.0 | 0.0 | 0.0  | 50.2            |
| 1%V-Mn <sub>2</sub> O <sub>3</sub>   | 24.4           | 7.1             | 35.8            | 28.7            | 3.3               | 1.0 | 0.0 | 0.0 | 0.0 | 0.0  | 23.5            |
| 5%V-Mn <sub>2</sub> O <sub>3</sub>   | <u>25.6</u>    | 6.0             | 27.8            | 31.0            | 3.3               | 3.2 | 0.1 | 0.0 | 1.1 | 0.0  | 26.9            |
| 10%V-Mn <sub>2</sub> O <sub>3</sub>  | 28.8           | 1.5             | 9.0             | 51.0            | 1.3               | 1.2 | 1.1 | 1.1 | 1.0 | 21.1 | 11.6            |
| 15%V-Mn <sub>2</sub> O <sub>3</sub>  | 11.9           | 0.3             | 4.9             | 41.6            | 0.0               | 0.0 | 0.0 | 0.0 | 0.0 | 36.4 | 16.8            |

<sup>a</sup> C<sub>1</sub>: methane, C<sub>2=</sub>: ethylene, C<sub>3=</sub>: propylene, CH<sub>2</sub>O: formaldehyde, ALD: acetaldehyde, ACR: acrolein, AcT: acetone, AcA: acrylic acid, AA: acetic acid

## IR of propane + O<sub>2</sub> adsorption

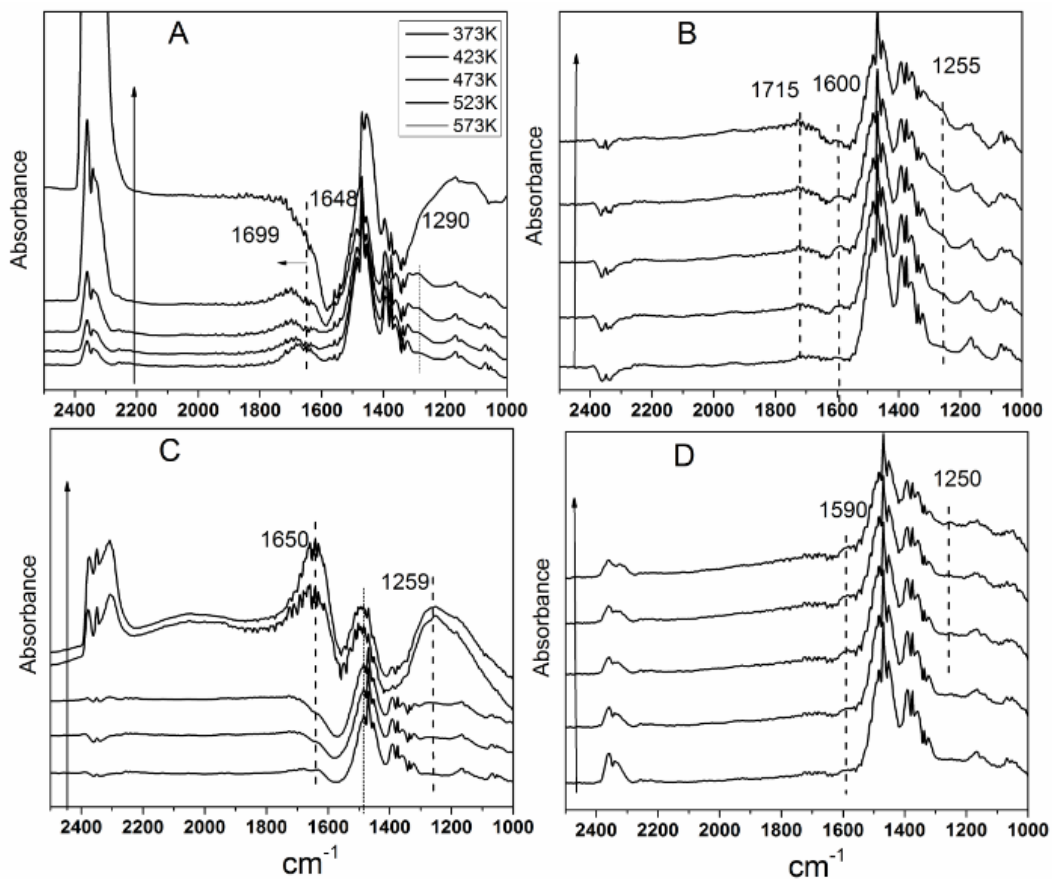

**Fig. S3** FT-IR spectra of reaction atmosphere (propane : O<sub>2</sub> = 1 : 1) adsorbed on (A) meso-Mn<sub>2</sub>O<sub>3</sub>, (B) 10% V-Mn<sub>2</sub>O<sub>3</sub>, (C) 10% Cu-Mn<sub>2</sub>O<sub>3</sub>, and (D) 10% Mo-Mn<sub>2</sub>O<sub>3</sub> at 373, 423, 473, 523 and 573 K.

## XPS

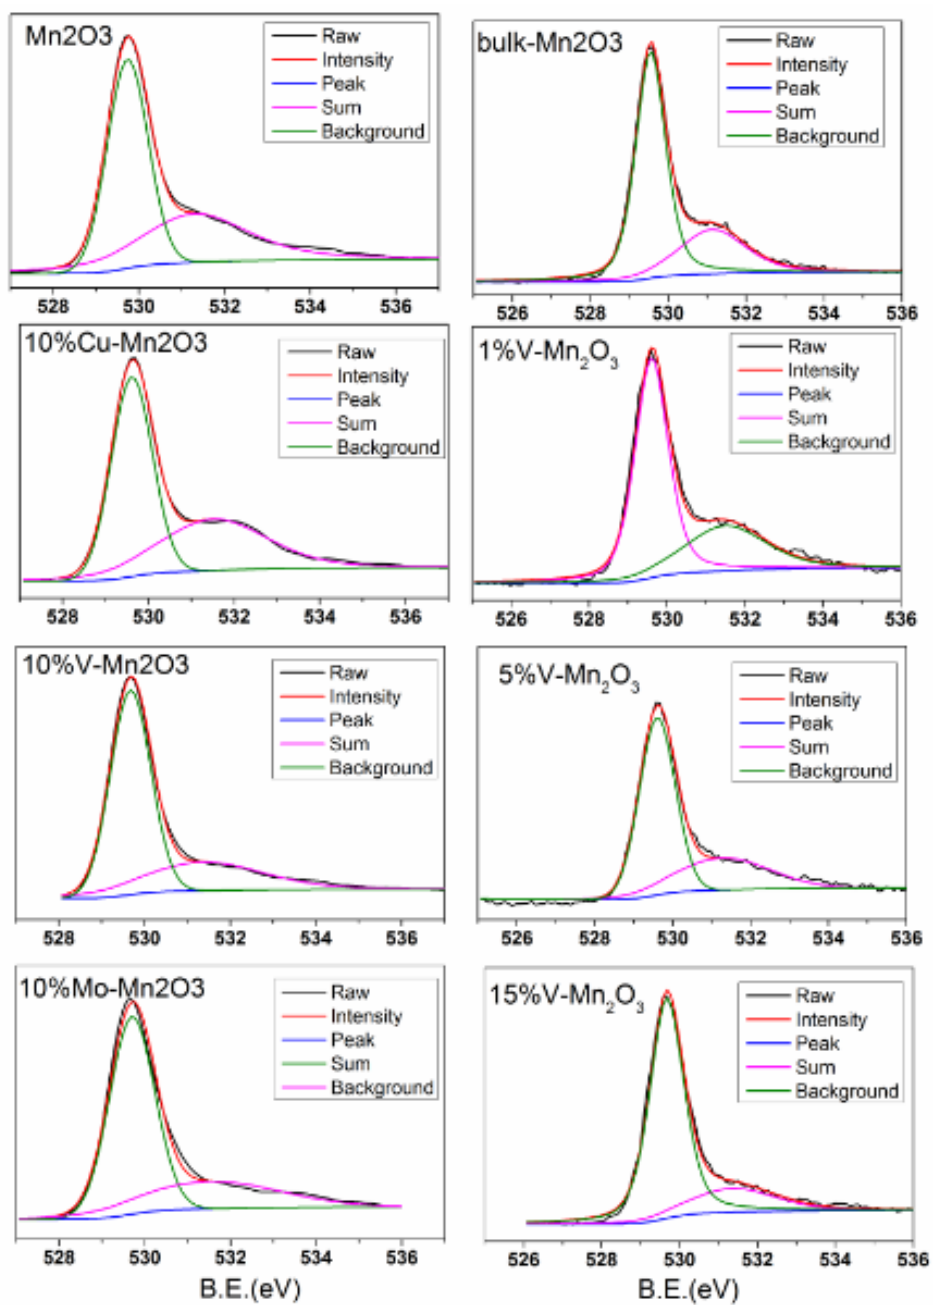

**Fig. S4** X-ray O1s photoelectron emission spectra from the indicated materials.

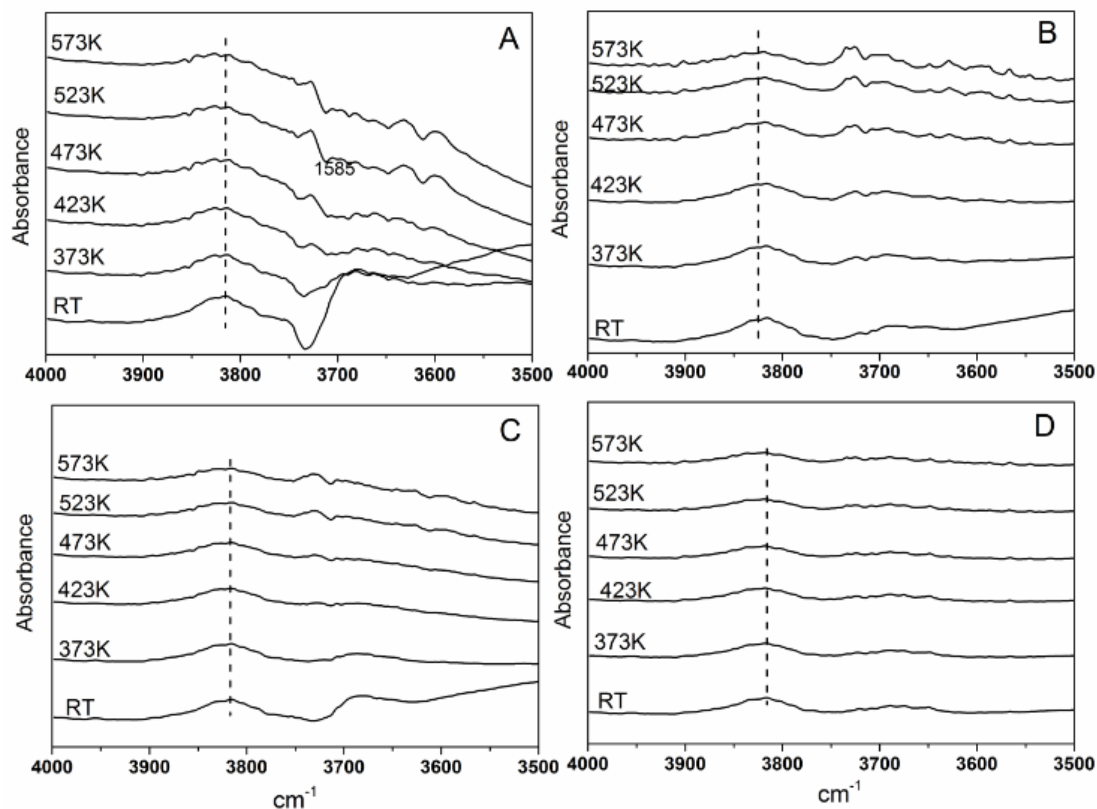

**Fig.S5** FT-IR spectra of -OH (in the absence of O<sub>2</sub>) on (A) meso-Mn<sub>2</sub>O<sub>3</sub>, (B) 10% V-Mn<sub>2</sub>O<sub>3</sub>, (C) 10%Cu-Mn<sub>2</sub>O<sub>3</sub>, 10%Mo-Mn<sub>2</sub>O<sub>3</sub>, and (D) 10%Mo-Mn<sub>2</sub>O<sub>3</sub>,10%Cu-Mn<sub>2</sub>O<sub>3</sub> from 323 to 573K.

## References

<sup>a</sup> Institute of Catalysis, Zhejiang University (Xixi Campus), Hangzhou 310028, PR China.

**S1** J.h. Jiang, A. Kucernak\*, *Electrochimica Acta*, 2002, **47**, 2381.

**S2** A. N. Desikan, L. Huang, S. T. Oyama, *J. Phys. Chem.*, 1991, **95**, 10050.

**S3** A. Khodakov, J. Yang, S. Su, E. Iglesia, A.T. Bell, *J. Catal.*, 1998, **177**, 343.

**S4** X. Gao, J.-M. Jehng, I.E. Wachs, *J. Catal.*, 2002, **209**, 43.

**S5** P. Gruene, T. Wolfram, K. Pelzer, R. Schlögl, A. Trunschke, *Catal. Today*, 2010, **157**, 137.
